# Supplementary material for: Unidirectional thermal expansion in KZnB3O6: role of alkali metals
Source: Royal Society of Chemistry journal article supplement (doi:10.1039/c5dt03836g), 2015-01-01
Supplement: c5dt03836g1.pdf [file c5dt03836g1.pdf]

## Supporting Information

### Unidirectional thermal expansion in $\text{KZnB}_3\text{O}_6$ : role of alkali metals

Yanfang Lou,<sup>a</sup> Dandan Li,<sup>a</sup> Zhilin Li,<sup>a</sup> Han Zhang,<sup>a</sup> Shifeng Jin<sup>\*a</sup> and Xiaolong Chen<sup>\*a,b</sup>

<sup>a</sup>Research & Development Center for Functional Crystals, Beijing National Laboratory for Condensed Matter Physics, Institute of Physics, Chinese Academy of Sciences, Beijing 100190, China.

<sup>b</sup>Collaborative Innovation Center of Quantum Matter, Beijing 100190, China.

Correspondence and requests for materials should be addressed to S.F.J (email: [shifengjin@iphy.ac.cn](mailto:shifengjin@iphy.ac.cn)) or to X.L.C (email: [chenx29@iphy.ac.cn](mailto:chenx29@iphy.ac.cn)).

**1. Experimental methods**

**2. Computational methods**

3. **Table S1.** The lattice constants for  $K_{0.5}M_{0.5}ZnB_3O_6$  ( $M = Na, K^5$  and Rb) at 298K.

4. **Figure S1.** The variation of lattice constants with temperatures for  $K_{0.5}M_{0.5}ZnB_3O_6$  ( $M = Na, K^5$  and Rb).

5. **Table S2.** The calculated bondlengths of  $M-O$  in  $MZnB_3O_6$  ( $M = Na, K^5$  and Rb) at ground states.

6. **Figure S2.** Specific heat of  $K_{0.5}M_{0.5}ZnB_3O_6$  ( $M = Na, K$  and Rb) and their fitting results.

7. **Figure S3.** The phonon dispersion of  $MZnB_3O_6$  ( $M = Na, K^5$  and Rb).

**8. References**

## Experimental methods

**Samples.** Polycrystalline samples of  $K_{1-x}M_xZnB_3O_6$  ( $M = Na$  and  $Rb$ ) ( $x \leq 0.8$ ) were synthesized by traditional solid-state reaction techniques. The stoichiometric mixtures of A.R.  $Na_2CO_3/K_2CO_3/Rb_2CO_3$ ,  $H_3BO_3$  and  $ZnO$  were ground well and packed into  $Al_2O_3$  crucible. In order to compensate for volatilization of alkali metals, 15% excess of  $Na_2CO_3/K_2CO_3/Rb_2CO_3$  (A.R.) is required. They were preheated at  $500\text{ }^\circ\text{C}$  for 12 h to decompose the carbonate and eliminate the water. Then they were intermediate grindings adequately, and calcined at  $700\text{ }^\circ\text{C}$  for 48 h. The single-phase powder of them was obtained. The purity of the samples was confirmed by powder X-ray diffraction (XRD) analysis. The powder XRD data were carried out with a Panalytical diffractometer (X'Pert PRO MRD) operating in Bragg–Brentano geometry with  $CuK\alpha$  ( $\lambda = 1.5418\text{ \AA}$ ) radiation and a graphite monochromator. The diffraction patterns were taken from  $10^\circ$  to  $80^\circ$  ( $2\theta$ ) with a scan step width of  $0.017^\circ$  at room temperature.

**High temperature XRD measurements.** Temperature-dependent *in situ* X-ray diffractometry was performed on an XPERT-PRO powder diffractometer system ( $CoK\alpha_1$ ;  $1.78901\text{ \AA}$ ) equipped with an Anton Paar HTK-1200N Oven Sample stage. The room-temperature diffraction pattern in the angular range from  $10^\circ$  to  $80^\circ$  with a scanning step width of  $0.017^\circ$  was firstly obtained as a standard, and then the sample was heated from 373 K to 973 K at intervals of 100 K. Each diffraction pattern was obtained 30 min after the required

temperature was reached. Unit cell parameters were then calculated by using the pattern indexing software Dicvol06.<sup>1</sup>

### **Computational methods**

The first-principles calculations presented in our work were performed with the CASTEP program code with the plane-wave pseudopotential method.<sup>2</sup> We adopted the generalized gradient approximation (GGA) in the form of the Perdew-Burke-Ernzerhof for the exchange-correlation potentials.<sup>3</sup> The ultrasoft pseudopotential with a plane-wave energy cutoff of 410 eV and a 4×4×4 Monkhorst Pack k-point mesh in the reciprocal space were used for all the calculations.<sup>4</sup> The self-consistent field was set as  $5 \times 10^{-7}$  eV/atom. Based on the experimental lattice parameters, all independent internal atomic coordinates were optimized (Broyden Fletcher Goldfarb Shanno algorithm) with the convergence standard given as follows: energy change less than  $5 \times 10^{-6}$  eV/atom, residual force less than 0.01 eV/Å, stress less than 0.02 GPa, and displacement of atom less than  $5 \times 10^{-4}$  Å. The phonon frequencies and phonon density of states (PHDOS) were obtained with the finite displacement method based on the optimized structures.

**Table S1.** The lattice constants for  $K_{0.5}M_{0.5}ZnB_3O_6$  ( $M = Na, K^5$  and Rb) at 298K.

|                     | $K_{0.5}Na_{0.5}ZnB_3O_6$ | $KZnB_3O_6^5$ | $K_{0.5}Rb_{0.5}ZnB_3O_6$ |
|---------------------|---------------------------|---------------|---------------------------|
| a (Å)               | 6.716(1)                  | 6.742(1)      | 6.803(2)                  |
| b (Å)               | 6.785(1)                  | 6.921(1)      | 6.949(1)                  |
| c (Å)               | 6.986(1)                  | 7.068(1)      | 7.106(1)                  |
| $\alpha$ (°)        | 63.40(1)                  | 63.13(1)      | 63.18(1)                  |
| $\beta$ (°)         | 71.73(1)                  | 72.40(1)      | 73.19(1)                  |
| $\gamma$ (°)        | 69.02(1)                  | 69.08(1)      | 69.08(1)                  |
| V (Å <sup>3</sup> ) | 261.26                    | 270.89        | 276.73                    |

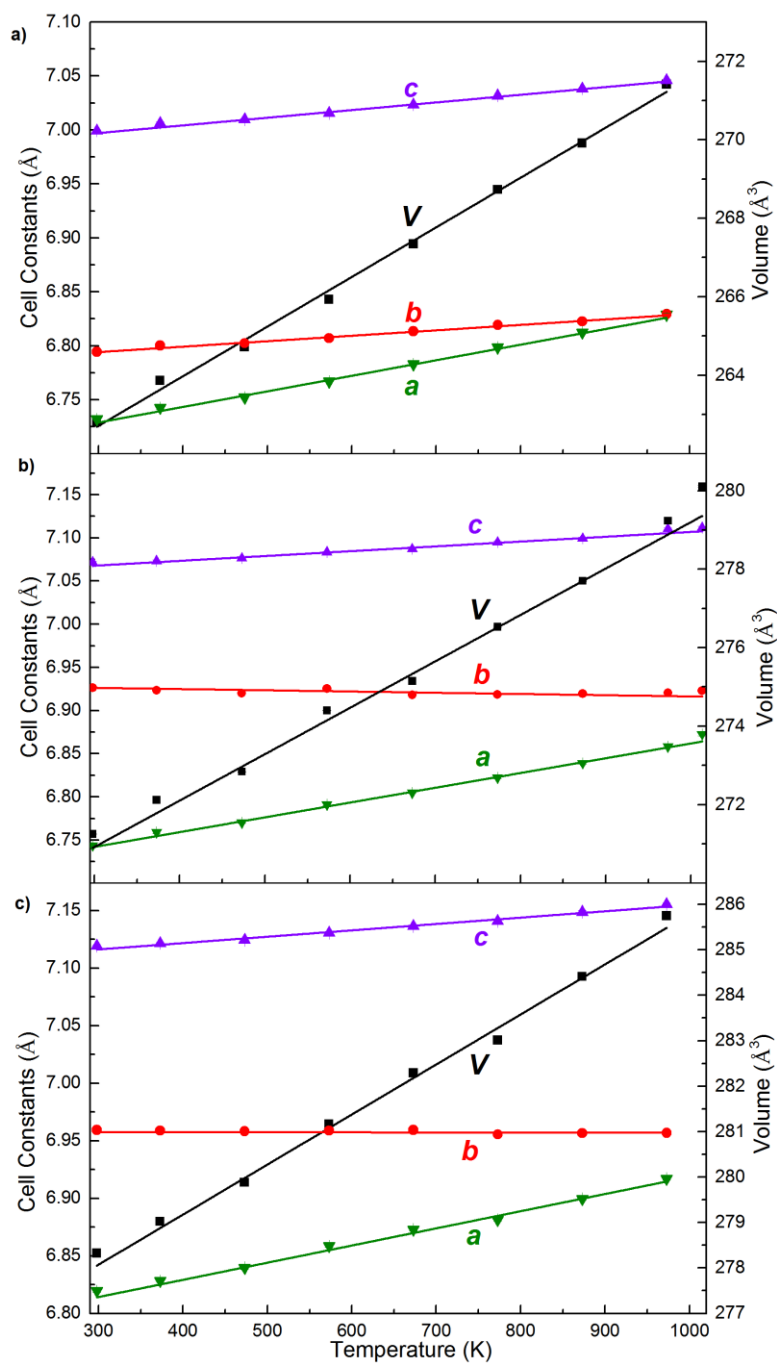

**Figure S1.** The variation of lattice constants with temperatures for

$K_{0.5}M_{0.5}ZnB_3O_6$  ( $M = Na, K^5$  and Rb).

a)  $K_{0.5}Na_{0.5}ZnB_3O_6$ ; b)  $KZnB_3O_6$ ;<sup>5</sup> c)  $K_{0.5}Rb_{0.5}ZnB_3O_6$ .

**Table S2.** The calculated bondlengths of *M*-O in *MZnB<sub>3</sub>O<sub>6</sub>* (*M* = Na, K<sup>5</sup> and Rb)

at ground states.

| Bonds | <i>M</i> = Na | <i>M</i> = K <sup>5</sup> | <i>M</i> = Rb |
|-------|---------------|---------------------------|---------------|
| M-O1  | 2.493         | 2.863                     | 3.062         |
| M-O2  | 3.433         | 3.228                     | 3.255         |
| M-O2  | 2.340         | 2.665                     | 2.820         |
| M-O3  | 2.997         | 3.115                     | 3.286         |
| M-O4  | 2.655         | 2.852                     | 2.943         |
| M-O5  | 3.307         | 3.276                     | 3.268         |
| M-O5  | 2.595         | 2.871                     | 3.016         |
| M-O6  | 2.631         | 2.884                     | 2.992         |
| M-O6  | 2.882         | 2.885                     | 2.958         |
| Δ%*   | 31.8%         | 18.7%                     | 14.2%         |

\*Δ%: Nonuniformity of the bond lengths

$$\Delta\% = [(\text{bond length})_{\max} - (\text{bond length})_{\min}] / (\text{bond length})_{\max}$$

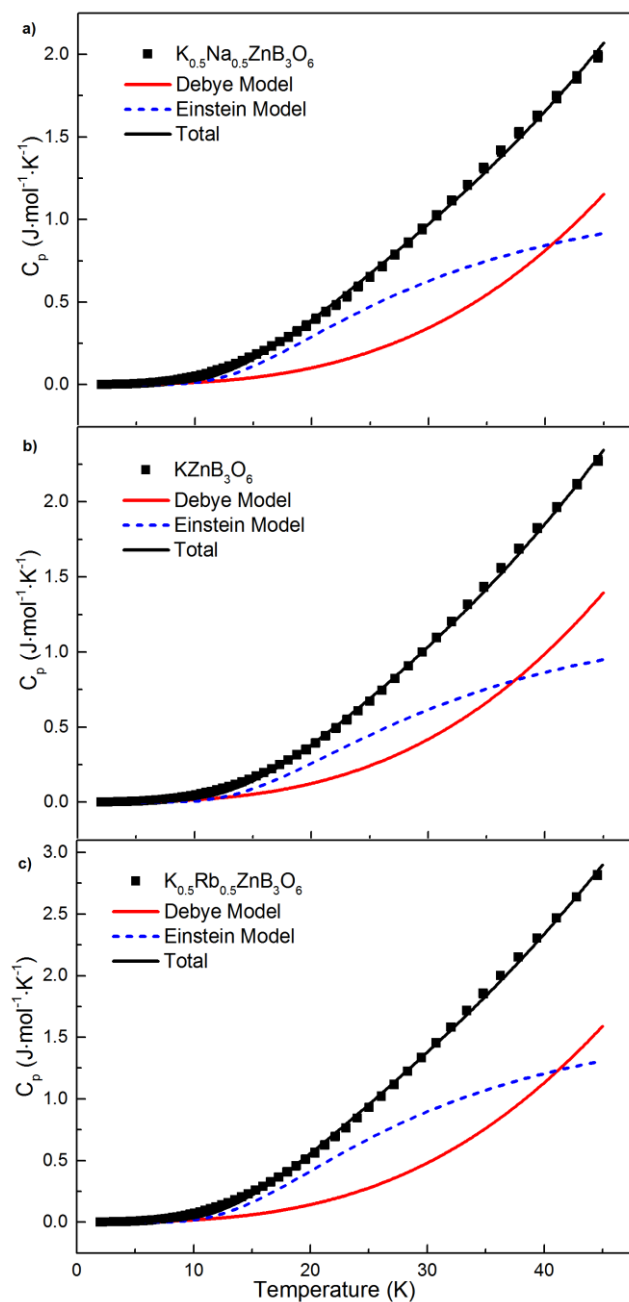

**Figure S2.** Specific heat of  $K_{0.5}M_{0.5}ZnB_3O_6$  ( $M = Na, K$  and  $Rb$ ) and their fitting results. a)  $K_{0.5}Na_{0.5}ZnB_3O_6$ ; b)  $KZnB_3O_6$ ; c)  $K_{0.5}Rb_{0.5}ZnB_3O_6$ . The symbols stand for experimental data; the red lines are the fitting results of the fraction of the Debye model; the blue short dashes are the fitting results of the fraction of the Einstein model; the black lines are the sum fitting results of Debye and Einstein model.



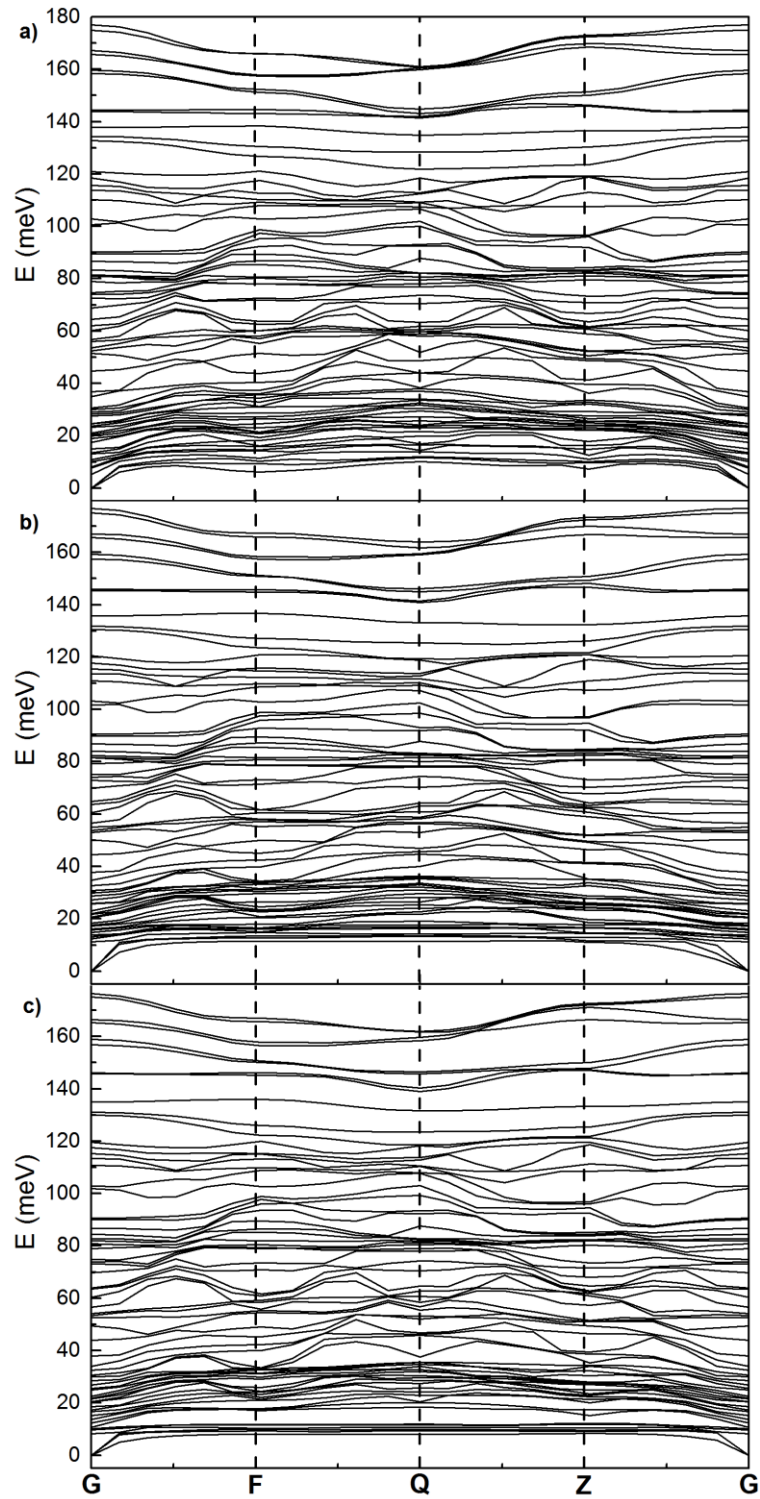

**Figure S3.** The phonon dispersion of  $M\text{ZnB}_3\text{O}_6$  ( $M = \text{Na}, \text{K}^5$  and  $\text{Rb}$ ). a)  $\text{NaZnB}_3\text{O}_6$ ; b)  $\text{KZnB}_3\text{O}_6$ ;<sup>5</sup> c)  $\text{RbZnB}_3\text{O}_6$ . It shows that the phonon dispersions above 20meV are similar, but downshifting on going from Na to K, and then to Rb below 20meV.

## References

1. A. Boultif and D. Louer, *J. Appl. Crystallogr.*, 2004, **37**, 724-731.
2. S. J. Clark, *et al.*, *Z. Kristallogr.*, 2005, **220**, 567-570.
3. J. P. Perdew, K. Burke, M. Ernzerhof, *Phys. Rev. Lett.*, 1996, **77**, 3865-3868.
4. H. J. Monkhorst, J. D. Pack, *Phys. Rev. B*, 1976, **13**, 5188-5192.
5. Y. F. Lou, D. D. Li, Z. L. Li, S. F. Jin and X. L. Chen, *Sci. Rep.*, 2015, **5**, 10996.
